# Supplementary material for: Surface patch binding induced interaction of anisotropic nanoclays with globular plasma proteins
Source: Royal Society of Chemistry journal article supplement (doi:10.1039/c6ra11669h), 2016-01-01
Supplement: c6ra11669h1.pdf [file c6ra11669h1.pdf]

Electronic Supplementary Information

**Surface Patch Binding Induced Interaction of Anisotropic Nanoclays with Globular  
Plasma Proteins**

Kishan Das<sup>1</sup>, Kamla Rawat<sup>2, 3\*</sup>, and H B Bohidar<sup>1,2\*</sup>

<sup>1</sup>School of Physical Sciences, Jawaharlal Nehru University, New Delhi 110067, India

<sup>2</sup>Special Center for Nanosciences, Jawaharlal Nehru University, New Delhi 110067, India

<sup>3</sup>Inter University Accelerator Centre (IUAC), New Delhi 110067, India

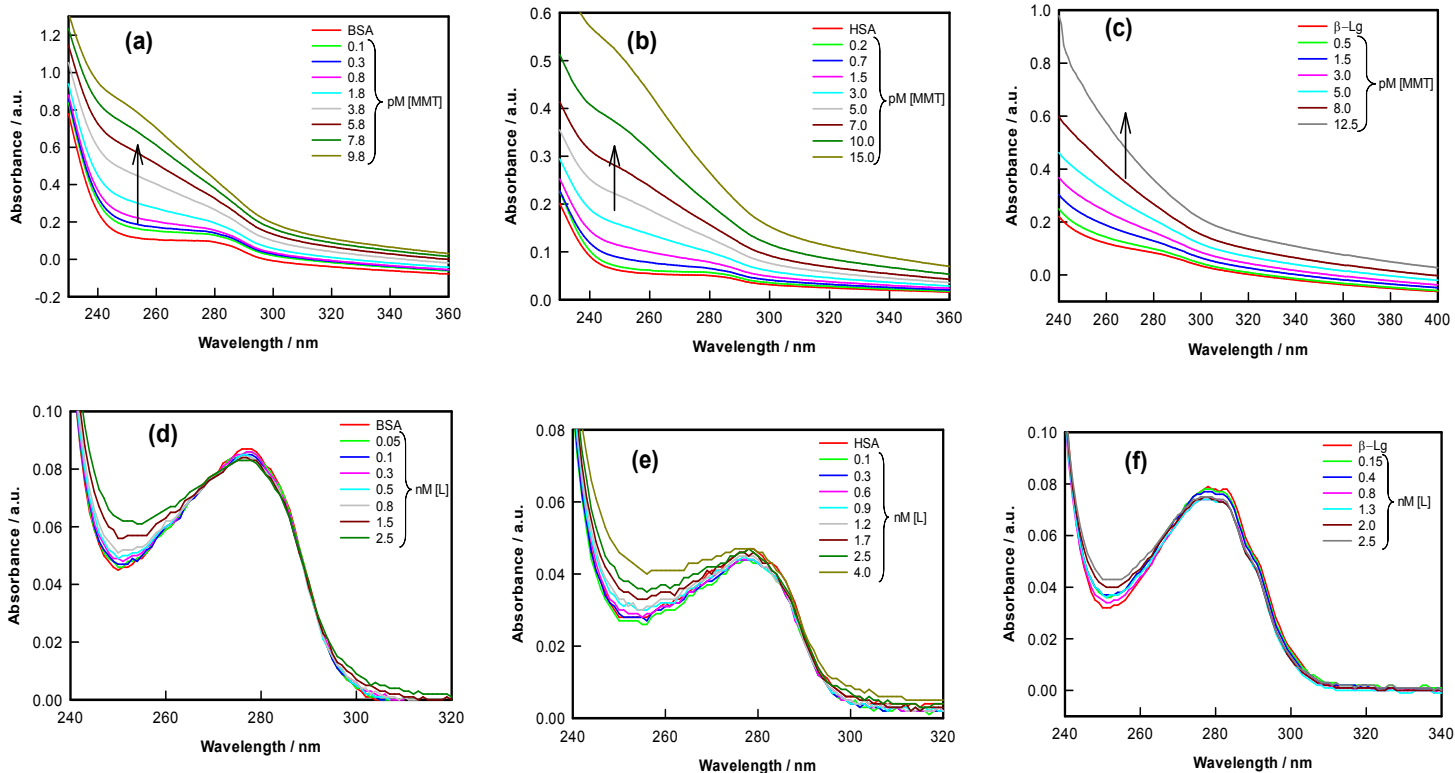

**Figure S1:** Absorbance spectra of proteins, (a) BSA(1.5 $\mu$ M), (b) HSA (1.5  $\mu$ M), (c)  $\beta$ -Lg (5.5  $\mu$ M) in the absence and presence of MMT and (d) BSA (1.5 $\mu$ M), (e) HSA (1.5  $\mu$ M), (f)  $\beta$ -Lg (5.5  $\mu$ M) in the absence and presence of laponite.

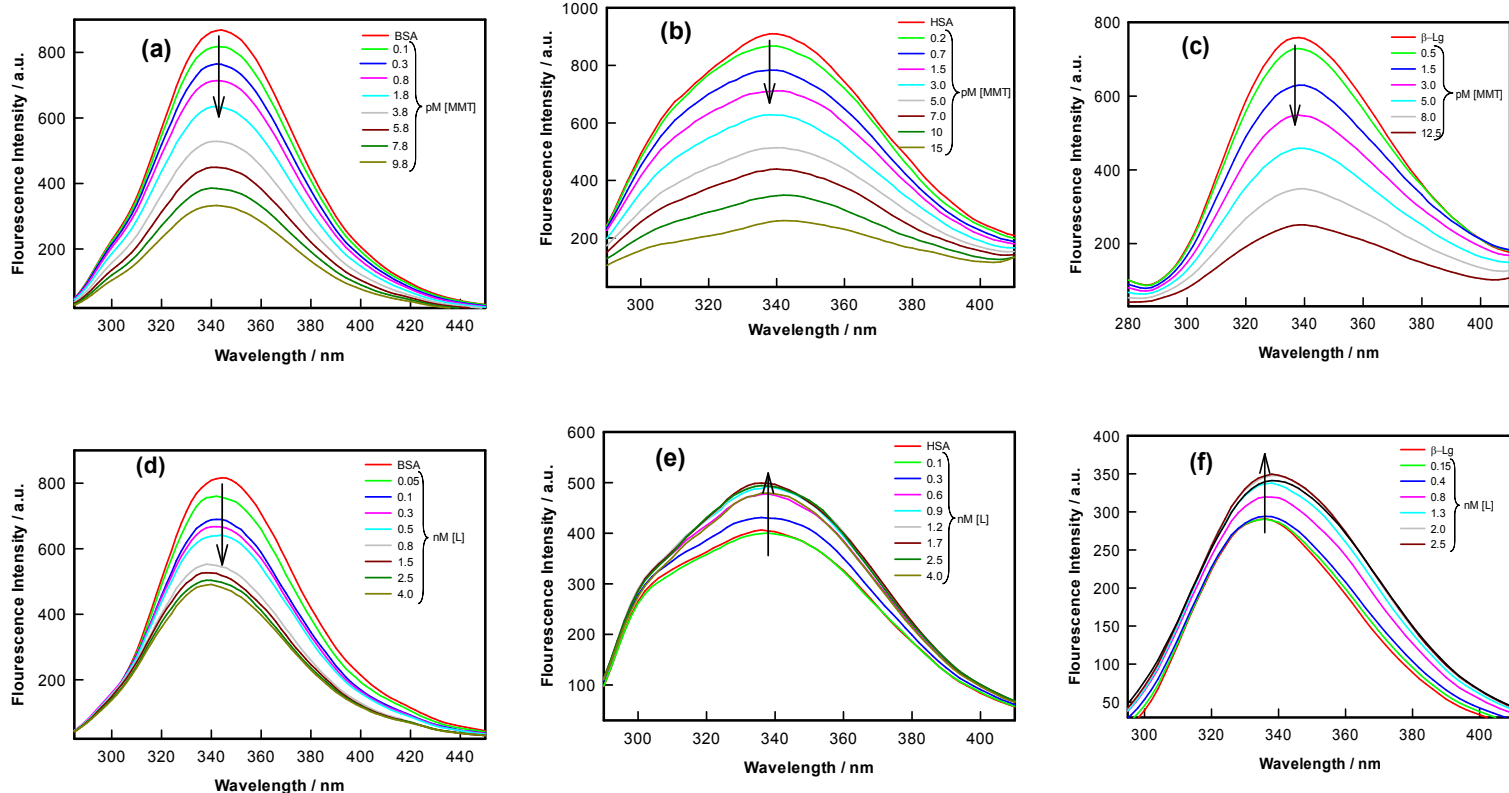

**Figure S2:** Emission spectra of proteins, (a) BSA(1.5 $\mu$ M), (b) HSA (1.5  $\mu$ M), (c)  $\beta$ -Lg (5.5  $\mu$ M) in the absence and presence of MMT and (d) BSA (1.5 $\mu$ M),(e) HSA (1.5  $\mu$ M), (f)  $\beta$ -Lg (5.5  $\mu$ M)in the absence and presence of laponite.

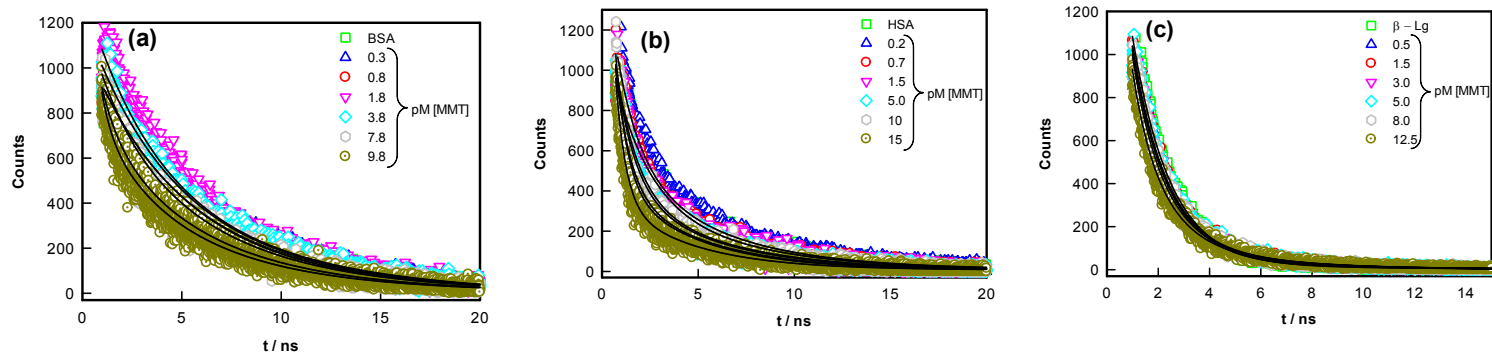

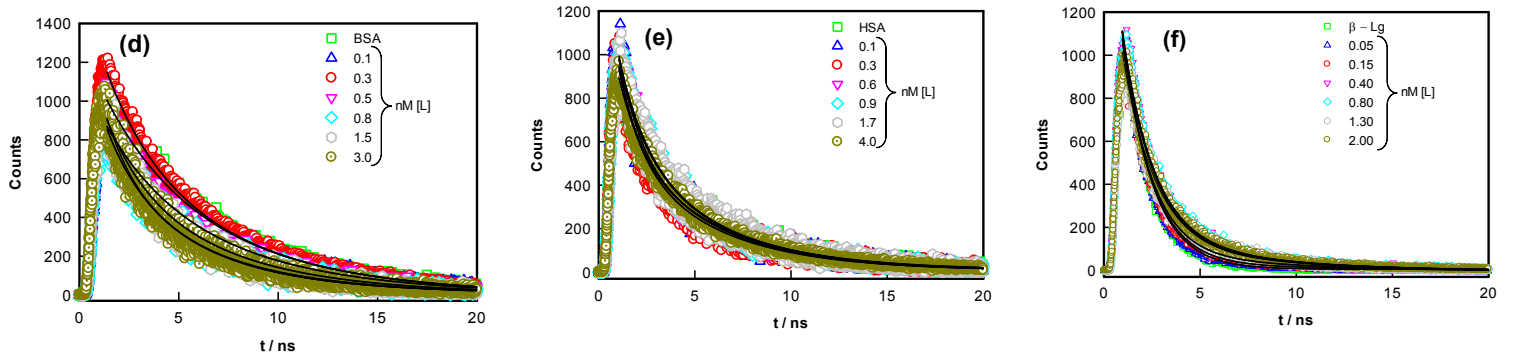

**Figure S3:** Time resolved fluorescence spectra of (a) BSA(1.5 $\mu$ M), (b) HSA (1.5  $\mu$ M), (c)  $\beta$ -Lg (5.5  $\mu$ M) in the absence and presence of various concentration of MMT and (d) BSA (1.5 $\mu$ M),(e) HSA (1.5  $\mu$ M), (f)  $\beta$ -Lg (5.5  $\mu$ M)in the absence and presence of various concentration of laponite recorded at room temperature (Excitation Wavelength = 290nm (LED)).

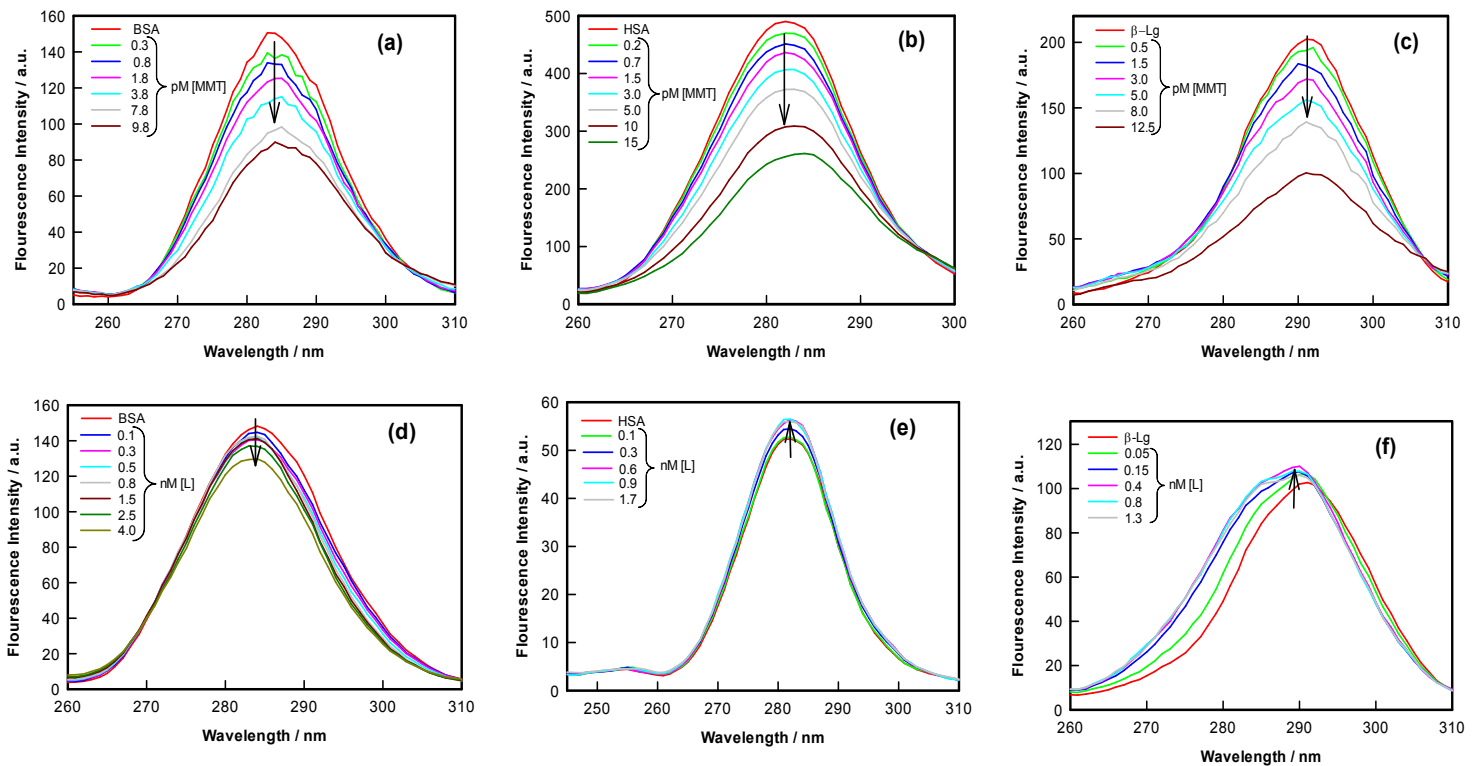

**Figure S4:**The synchronous fluorescence spectra at  $\Delta\lambda=15$  nm (Tyrosine)of proteins, (a) BSA(1.5 $\mu$ M), (b) HSA (1.5  $\mu$ M), (c)  $\beta$ -Lg (5.5  $\mu$ M) in the absence and presence of MMT and (d) BSA (1.5 $\mu$ M),(e) HSA (1.5  $\mu$ M), (f)  $\beta$ -Lg (5.5  $\mu$ M)in the absence and presence of laponite.

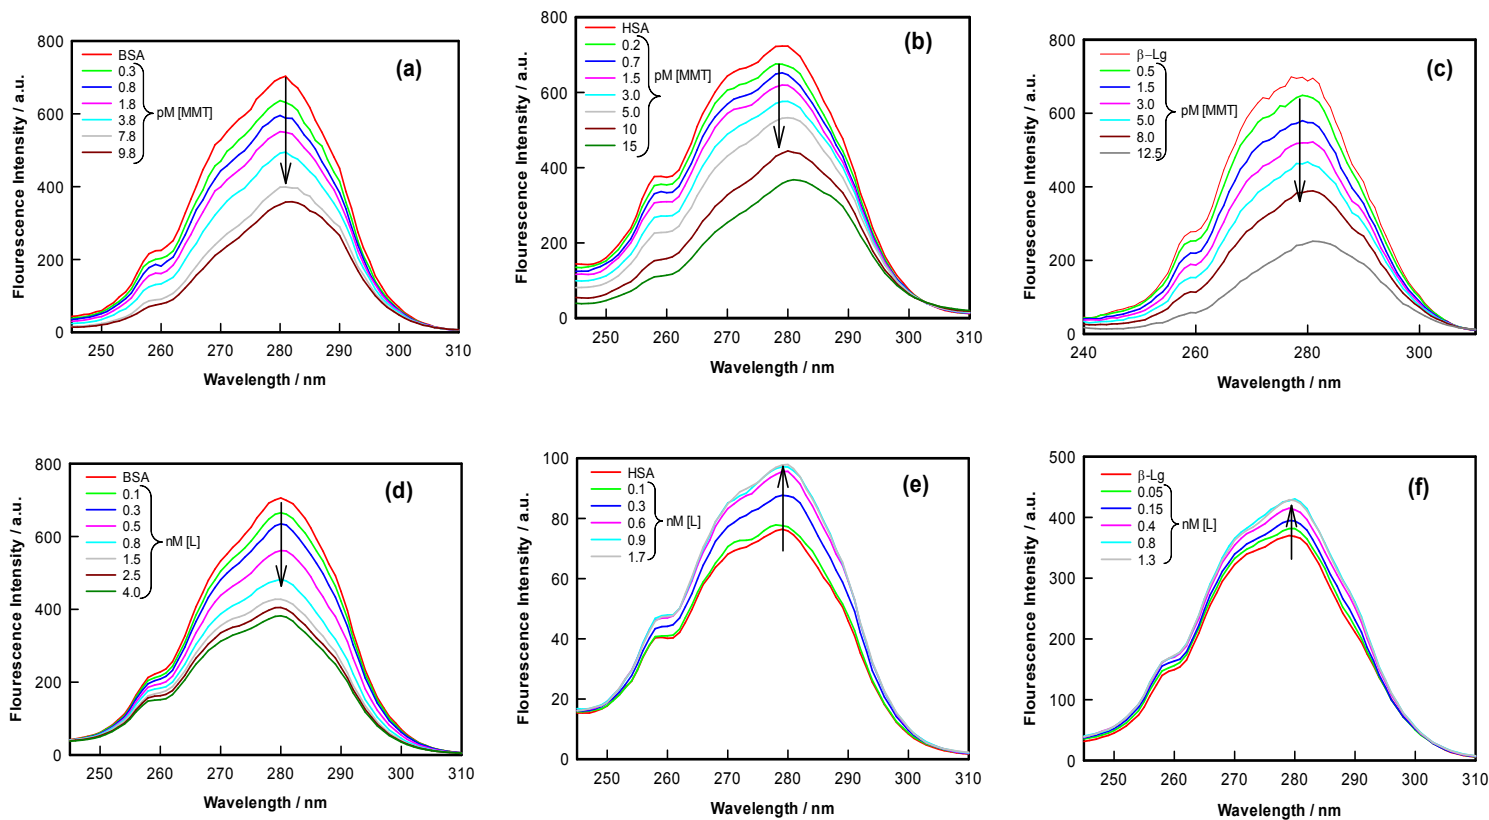

**Figure S5:** The synchronous fluorescence spectra at  $\Delta\lambda=60$  nm (Tryptophan) of proteins, (a) BSA (1.5  $\mu\text{M}$ ), (b) HSA (1.5  $\mu\text{M}$ ), (c)  $\beta$ -Lg (5.5  $\mu\text{M}$ ) in the absence and presence of MMT and (d) BSA (1.5  $\mu\text{M}$ ), (e) HSA (1.5  $\mu\text{M}$ ), (f)  $\beta$ -Lg (5.5  $\mu\text{M}$ ) in the absence and presence of laponite.

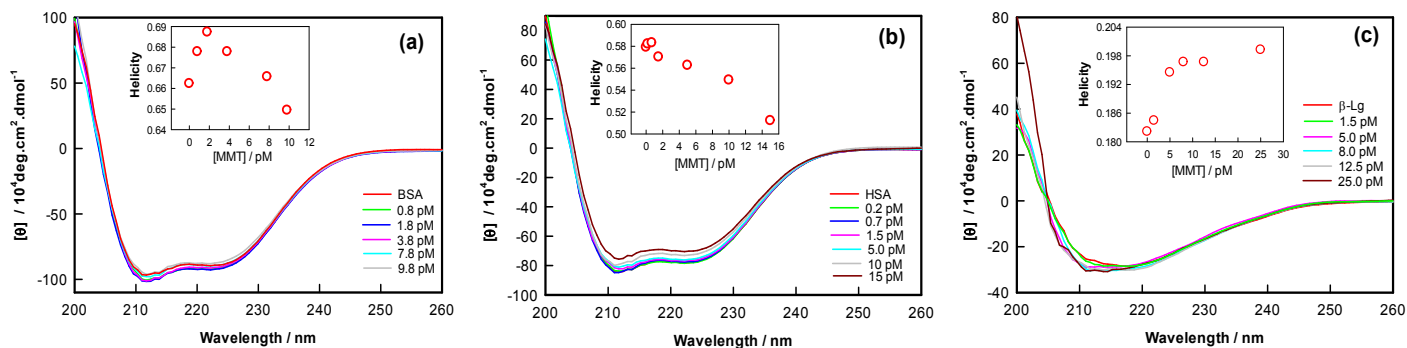

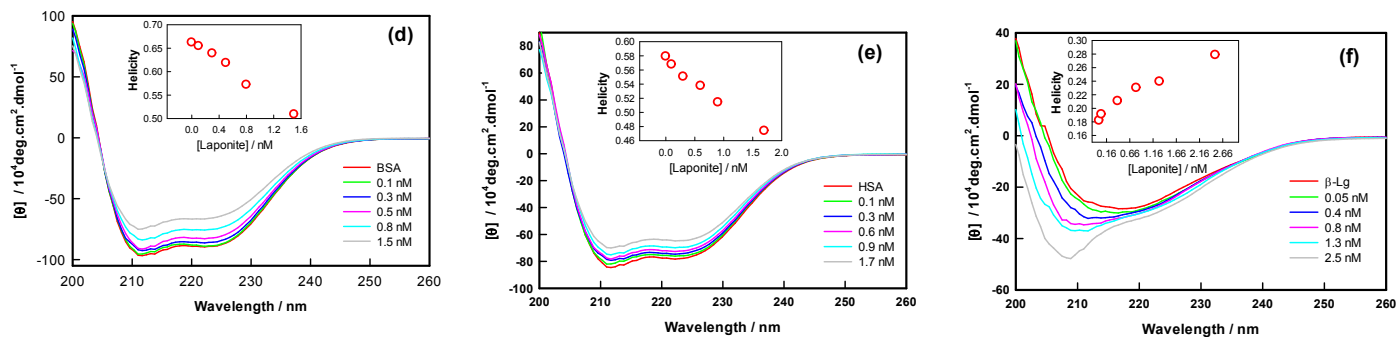

**Figure S6:** The CD spectra of proteins, (a) BSA (1.5  $\mu\text{M}$ ), (b) HSA (1.5  $\mu\text{M}$ ), (c)  $\beta$ -Lg (5.5  $\mu\text{M}$ ) in the absence and presence of MMT and (d) BSA (1.5  $\mu\text{M}$ ), (e) HSA (1.5  $\mu\text{M}$ ), (f)  $\beta$ -Lg (5.5  $\mu\text{M}$ ) in the absence and presence of laponite.
